# Supplementary material
Source: Springer Nature journal article supplement (https://www.springermedizin.de/resource/supplementary/12885_2006_501_MOESM1_ESM.pdf/9469628)

tPA ( $\mu\text{g/ml}$ )

0

20

kDa 0 2 4.5 20

0 2 4.5 20 (h)

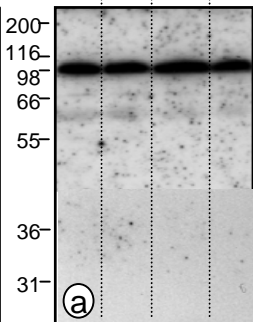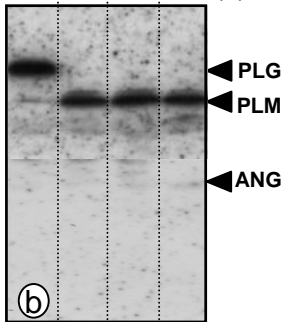

kDa 0 2 4.5 20

0 2 4.5 20 (h)

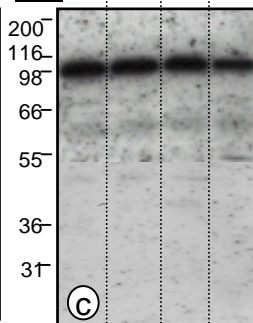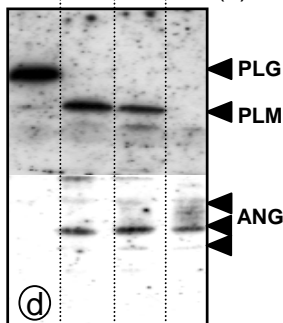

Supplement: MOESM1 [file 9469628]
